# Supplementary material for: Influenza Vaccination and Myo-Pericarditis in Patients Receiving Immune Checkpoint Inhibitors: Investigating the Likelihood of Interaction through the Vaccine Adverse Event Reporting System and VigiBase
Source: MDPI journal article supplement (doi:10.3390/vaccines9010019), 2021-01-04
Supplement: s1 [file s1]

**Influenza vaccination and myo-pericarditis in patients receiving immune checkpoint inhibitors: investigating the likelihood of interaction through the Vaccine Adverse Event Reporting System and Vigibase**

Milo Gatti, Emanuel Raschi, Ugo Moretti, Andrea Ardizzoni, Elisabetta Poluzzi, Igor Diemberger

**SUPPLEMENTARY MATERIALS**

**Supplementary Table 1** – Case-by-case assessment of reports recorded in VAERS in which influenza vaccine and immune checkpoint inhibitors (ICIs) were concomitantly used.

**Supplementary Table 2** – Application of the adapted version of Drug Interaction Probability Scale in cases of myocarditis/pericarditis in which immune checkpoint inhibitors (ICIs) and influenza vaccine were concomitantly administered.

**Supplementary Table 1** – Case-by-case assessment of reports recorded in VAERS in which influenza vaccine and immune checkpoint inhibitors (ICIs) were concomitantly used.

| Case ID | Drugs                              | Year | Age/Sex | Reporter country | Reporter qualification | Time to onset (days) | Reactions                                                                                                                                                                                                                   | Seriousness | Outcome       | Concomitant medications                                                                                                  | Comorbidities                                                                                                                                       | Management             |
|---------|------------------------------------|------|---------|------------------|------------------------|----------------------|-----------------------------------------------------------------------------------------------------------------------------------------------------------------------------------------------------------------------------|-------------|---------------|--------------------------------------------------------------------------------------------------------------------------|-----------------------------------------------------------------------------------------------------------------------------------------------------|------------------------|
| #1      | Influenza vaccine<br>Pembrolizumab | 2018 | NA/M    | NA               | Physician              | NA                   | Allergy to vaccine                                                                                                                                                                                                          | Not serious | NA            | Oxycodone<br>Ondansetron<br>Prochlorperazine                                                                             | Mesothelioma                                                                                                                                        | NA                     |
| #2      | Influenza vaccine<br>Pembrolizumab | 2018 | 63/F    | US               | Physician              | 1                    | Fall<br>Head injury<br>Loss of consciousness<br>Lower limb fracture<br>Nausea                                                                                                                                               | Not serious | Recovered     | Prednisone<br>Bevacizumab<br>Atorvastatin<br>Losartan<br>Pregabalin<br>Bisacodyl<br>Selenium<br>Vitamin B2               | NA                                                                                                                                                  | NA                     |
| #3      | Influenza vaccine<br>Nivolumab     | 2019 | 71/M    | US               | Physician              | 4 hours              | Chills<br>Pyrexia<br>Vomiting                                                                                                                                                                                               | Not serious | Recovered     | Gabapentin<br>Triamterene<br>Hydrochlorothiazide<br>Levothyroxine<br>Carbamazepine<br>Phenytoin<br>Budesonide/Formoterol | Seizure<br>COPD<br>Renal cell carcinoma metastasized to lung<br><br>Previous reaction to influenza vaccine four years ago                           | Anti-emetics<br>Fluids |
| #4      | Influenza vaccine<br>Nivolumab     | 2019 | 82/M    | US               | Physician              | 1                    | Feeling cold<br>Muscular weakness<br>Nausea<br>Tremor<br>Vomiting                                                                                                                                                           | Not serious | Recovered     | Levothyroxine<br>Prednisone<br>Doxazosin<br>Pneumococcal vaccine                                                         | Hypothyroidism<br>Cancer not specified                                                                                                              | NA                     |
| #5      | Influenza vaccine<br>Nivolumab     | 2018 | 67/M    | NA               | Physician              | NA                   | Alanine aminotransferase increased<br>Aspartate aminotransferase increased<br>Blood alkaline phosphatase increased<br>Blood bilirubin normal<br>Blood calcium normal<br>Blood chloride increased<br>Blood creatinine normal | Not serious | Not recovered | Pazopanib                                                                                                                | Hypertension<br>Clear cell renal cell carcinoma<br>Metastases to lung<br>Alcohol use<br>Metastases to bone<br>Prostate cancer<br>Malignant melanoma | NA                     |

|    |                                    |      |      |    |           |    |                                                                                                                                                                                                                                                                                                                                                                                                                                      |                 |               |   |                     |                                          |
|----|------------------------------------|------|------|----|-----------|----|--------------------------------------------------------------------------------------------------------------------------------------------------------------------------------------------------------------------------------------------------------------------------------------------------------------------------------------------------------------------------------------------------------------------------------------|-----------------|---------------|---|---------------------|------------------------------------------|
|    |                                    |      |      |    |           |    | Blood potassium normal<br>Blood sodium normal<br>Blood urea increased<br>Carbon dioxide normal<br>Cough<br>Dyspnoea<br>Haematocrit decreased<br>Haemoglobin decreased<br>Mean cell volume normal<br>Neurological examination normal<br>Platelet count normal<br>Psychiatric evaluation normal<br>Radiation pneumonitis<br>Rales<br>Sleep disorder<br>Toxicity to various agents<br>Weight decreased<br>White blood cell count normal |                 |               |   |                     |                                          |
| #6 | Influenza vaccine<br><br>Nivolumab | 2019 | 66/M | NA | Physician | 21 | Anti-neuronal antibody<br>Antibody test negative<br>Areflexia<br>Asthenia<br>Autonomic nervous system imbalance<br>Blood pressure fluctuation<br>Bradycardia<br>Computerised tomogram abdomen abnormal<br>Computerised tomogram pelvis abnormal<br>CSF lymphocyte count normal<br>CSF monocyte count increased<br>CSF protein increased<br>CSF red blood cell count positive                                                         | Serious (death) | Not recovered | - | Metastatic melanoma | Intravenous immunoglobulin<br>Prednisone |

|  |  |  |  |  |  |  |                                                                                                                                                                                                                                                                                                                                                                                                                                                                                                                                                                                                                                                                                     |  |  |  |  |  |
|--|--|--|--|--|--|--|-------------------------------------------------------------------------------------------------------------------------------------------------------------------------------------------------------------------------------------------------------------------------------------------------------------------------------------------------------------------------------------------------------------------------------------------------------------------------------------------------------------------------------------------------------------------------------------------------------------------------------------------------------------------------------------|--|--|--|--|--|
|  |  |  |  |  |  |  | CSF white blood cell<br>count increased<br>Cytology normal<br>Death<br>Decreased vibratory<br>sense<br>Demyelinating<br>polyneuropathy<br>Electromyogram<br>abnormal<br>Endotracheal<br>intubation<br>Gait inability<br>Guillain-barre<br>syndrome<br>Heart rate abnormal<br>Hepatic mass<br>Hypotension<br>Immunoglobulin<br>therapy<br>Mechanical<br>ventilation<br>Metastases to central<br>nervous system<br>Muscular weakness<br>Nerve conduction<br>studies abnormal<br>Nuclear magnetic<br>resonance imaging<br>brain abnormal<br>Paraesthesia<br>Plasmapheresis<br>Respiratory distress<br>Sensory loss<br>Tachycardia<br>Walking aid user<br>Withdrawal of life<br>support |  |  |  |  |  |
|--|--|--|--|--|--|--|-------------------------------------------------------------------------------------------------------------------------------------------------------------------------------------------------------------------------------------------------------------------------------------------------------------------------------------------------------------------------------------------------------------------------------------------------------------------------------------------------------------------------------------------------------------------------------------------------------------------------------------------------------------------------------------|--|--|--|--|--|

CSF: cerebrospinal fluid; COPD: chronic obstructive pulmonary disease; NA: not available

**Supplementary Table 2** – Application of the adapted version of Drug Interaction Probability Scale in cases of myocarditis/pericarditis in which immune checkpoint inhibitors (ICIs) and influenza vaccine were concomitantly administered.

| Items              | Case #1<br>(Influenza vaccine-Nivolumab)                                                                                                                                                                                        | Case #2<br>(Influenza vaccine-Pembrolizumab)                                                                                                                                                                                    | Case#3<br>(Influenza vaccine-Nivolumab/Ipilimumab)                                                                                                                                                                              |
|--------------------|---------------------------------------------------------------------------------------------------------------------------------------------------------------------------------------------------------------------------------|---------------------------------------------------------------------------------------------------------------------------------------------------------------------------------------------------------------------------------|---------------------------------------------------------------------------------------------------------------------------------------------------------------------------------------------------------------------------------|
| #1                 | NA (0 pts)<br>A retrospective case-control study [15] reported cases of myocarditis in patients treated with ICIs exposed to influenza vaccine, although less severe compared to cases of myocarditis in non-vaccinate patients | NA (0 pts)<br>A retrospective case-control study [15] reported cases of myocarditis in patients treated with ICIs exposed to influenza vaccine, although less severe compared to cases of myocarditis in non-vaccinate patients | NA (0 pts)<br>A retrospective case-control study [15] reported cases of myocarditis in patients treated with ICIs exposed to influenza vaccine, although less severe compared to cases of myocarditis in non-vaccinate patients |
| #2                 | NA (0 pts)<br>A possible PD mechanism of the interaction could be theoretically hypothesized although literature data are lacking                                                                                               | NA (0 pts)<br>A possible PD mechanism of the interaction could be theoretically hypothesized although literature data are lacking                                                                                               | NA (0 pts)<br>A possible PD mechanism of the interaction could be theoretically hypothesized although literature data are lacking                                                                                               |
| #3                 | NA (0 pts)<br>A possible PD mechanism of the interaction could be theoretically hypothesized although literature data are lacking                                                                                               | NA (0 pts)<br>A possible PD mechanism of the interaction could be theoretically hypothesized although literature data are lacking                                                                                               | NA (0 pts)<br>A possible PD mechanism of the interaction could be theoretically hypothesized although literature data are lacking                                                                                               |
| #4                 | NA (0 pts)<br>Onset time was not available for this report                                                                                                                                                                      | NA (0 pts)<br>Onset time was not available for this report                                                                                                                                                                      | NA (0 pts)<br>Onset time was not available for this report                                                                                                                                                                      |
| #5                 | NA (0 pts)<br>Dechallenge is unfeasible for vaccines considering the peculiarities of their administration                                                                                                                      | NA (0 pts)<br>Dechallenge is unfeasible for vaccines considering the peculiarities of their administration                                                                                                                      | NA (0 pts)<br>Dechallenge is unfeasible for vaccines considering the peculiarities of their administration                                                                                                                      |
| #6                 | NA (0 pts)<br>Rechallenge is unfeasible for vaccines considering the peculiarities of their administration                                                                                                                      | NA (0 pts)<br>Rechallenge is unfeasible for vaccines considering the peculiarities of their administration                                                                                                                      | NA (0 pts)<br>Rechallenge is unfeasible for vaccines considering the peculiarities of their administration                                                                                                                      |
| #7                 | No (+1 pts)<br>No underlying diseases or concomitant drugs known to cause or precipitate myocarditis were reported                                                                                                              | No (+1 pts)<br>No underlying diseases or concomitant drugs known to cause or precipitate myocarditis were reported                                                                                                              | No (+1 pts)<br>No underlying diseases or concomitant drugs known to cause or precipitate myocarditis were reported                                                                                                              |
| #8                 | NA (0 pts)<br>PD interactions usually do not entail changes in the concentrations of the object drug, and nivolumab concentrations were not monitored                                                                           | NA (0 pts)<br>PD interactions usually do not entail changes in the concentrations of the object drug, and pembrolizumab concentrations were not monitored                                                                       | NA (0 pts)<br>PD interactions usually do not entail changes in the concentrations of the object drug, and ipilimumab/nivolumab concentrations were not monitored                                                                |
| #9                 | NA (0 pts)<br>No other evidence of the interaction was reported                                                                                                                                                                 | NA (0 pts)<br>No other evidence of the interaction was reported                                                                                                                                                                 | Yes (+1 pts)<br>Increase in troponin concentration was reported                                                                                                                                                                 |
| #10                | NA (0 pts)<br>Dose adjustments is unfeasible for vaccines considering the peculiarities of their administration                                                                                                                 | NA (0 pts)<br>Dose adjustments is unfeasible for vaccines considering the peculiarities of their administration                                                                                                                 | NA (0 pts)<br>Dose adjustments is unfeasible for vaccines considering the peculiarities of their administration                                                                                                                 |
| <b>Total score</b> | <b>1 (Doubtful)</b>                                                                                                                                                                                                             | <b>1 (Doubtful)</b>                                                                                                                                                                                                             | <b>2 (Possible)</b>                                                                                                                                                                                                             |

ICIs were considered as the objective drugs (i.e., the one affected by the presence of another drug), while influenza vaccine was considered as the precipitant drug (i.e., the one causing a change on the object drug).

PD: pharmacodynamic; NA: unknown or non-applicable.
